# Supplementary material for: Whole-pattern fitting technique in serial femtosecond nanocrystallography
Source: PubMed Central journal article supplement (PMC4775161; doi:10.1107/s2052252516001238), 2016-02-12
Supplement: m-03-00127-sup1.pdf [file m-03-00127-sup1.pdf]

# IUCrJ

**Volume 3 (2016)**

**Supporting information for article:**

**Whole-pattern fitting technique in serial femtosecond  
nanocrystallography**

**Ruben A. Dilanian, Sophie R. Williams, Andrew V. Martin, Victor A. Stretsov  
and Harry M. Quiney**

## Whole-pattern fitting technique in serial femtosecond nanocrystallography

Ruben A. Dilanian, Sophie R. Williams, Andrew V. Martin, Victor A. Stretsov and Harry M. Quiney

### Supplementary Information

**Table S1.** Structure factor moduli of selected Bragg reflections extracted from a merged diffraction pattern from the test protein using the whole-pattern fitting approach,  $|F^{WPF}|$ , the integration approach,  $|F^I|$ , and calculated using published data (PDB ID: 4AK8),  $|F^C|$ .  $\Omega^{WPF}$  and  $\Omega^I$  are the relative errors for  $|F^{WPF}|$  and  $|F^I|$  respectively. The diffraction pattern was calculated in the  $(hk0)$  crystallographic plane from a set of 2000 crystallites with a mean of 30 unit-cells along [100] direction and of 10 unit-cells along the [010] direction. The diffraction pattern was simulated on a 340x340 pixel array to 5.0 Å resolution. The average relative errors,  $\langle \Omega^{WPF} \rangle = 0.06$  and  $\langle \Omega^I \rangle = 0.13$ , have been calculated with several weak reflections excluded (indicated in bold).

| <i>h</i> | <i>k</i> | <i>l</i> | $ F^C $ | $ F^{WPF} $ | $\Omega^{WPF}$ | $ F^I $ | $\Omega^I$ | <i>h</i> | <i>k</i> | <i>l</i> | $ F^C $ | $ F^{WPF} $ | $\Omega^{WPF}$ | $ F^I $ | $\Omega^I$ |
|----------|----------|----------|---------|-------------|----------------|---------|------------|----------|----------|----------|---------|-------------|----------------|---------|------------|
| 15       | 15       | 0        | 1479.44 | 1387.84     | 0.06           | 1392.08 | 0.06       | 9        | 15       | 0        | 348.55  | 334.33      | 0.04           | 348.15  | 0.00       |
| 15       | 14       | 0        | 765.45  | 721.29      | 0.06           | 673.07  | 0.12       | 9        | 14       | 0        | 1691.03 | 1580.70     | 0.07           | 1653.20 | 0.02       |
| 15       | 13       | 0        | 719.08  | 667.83      | 0.07           | 719.89  | 0.00       | 9        | 13       | 0        | 601.14  | 559.13      | 0.07           | 618.65  | 0.03       |
| 15       | 12       | 0        | 119.05  | 118.77      | 0.00           | 61.28   | 0.49       | 9        | 12       | 0        | 427.85  | 413.24      | 0.03           | 469.07  | 0.10       |
| 15       | 11       | 0        | 341.29  | 321.21      | 0.06           | 297.45  | 0.13       | 9        | 11       | 0        | 718.64  | 673.14      | 0.06           | 739.90  | 0.03       |
| 15       | 10       | 0        | 140.19  | 137.59      | 0.02           | 183.96  | 0.31       | 9        | 10       | 0        | 112.06  | 106.48      | 0.05           | 106.82  | 0.05       |
| 15       | 9        | 0        | 175.08  | 171.20      | 0.02           | 147.19  | 0.16       | 9        | 9        | 0        | 164.33  | 152.49      | 0.07           | 184.38  | 0.12       |
| 15       | 8        | 0        | 165.56  | 164.25      | 0.01           | 152.63  | 0.08       | 9        | 8        | 0        | 552.65  | 521.81      | 0.06           | 458.84  | 0.17       |
| 15       | 7        | 0        | 1122.08 | 1033.00     | 0.08           | 1219.34 | 0.09       | 9        | 7        | 0        | 746.68  | 704.97      | 0.06           | 766.41  | 0.03       |
| 15       | 6        | 0        | 885.83  | 833.21      | 0.06           | 925.19  | 0.04       | 9        | 6        | 0        | 153.23  | 148.84      | 0.03           | 121.82  | 0.20       |
| 15       | 5        | 0        | 564.17  | 536.45      | 0.05           | 473.25  | 0.16       | 9        | 5        | 0        | 276.23  | 259.15      | 0.06           | 284.48  | 0.03       |

|           |           |          |              |              |             |               |             |          |          |          |             |              |             |              |             |
|-----------|-----------|----------|--------------|--------------|-------------|---------------|-------------|----------|----------|----------|-------------|--------------|-------------|--------------|-------------|
| 15        | 4         | 0        | 71.54        | 63.84        | 0.11        | 87.91         | 0.23        | 9        | 4        | 0        | 117.62      | 108.81       | 0.07        | 121.12       | 0.03        |
| 14        | 15        | 0        | 167.96       | 170.06       | 0.01        | 118.12        | 0.30        | 8        | 15       | 0        | 1812.42     | 1707.92      | 0.06        | 1217.05      | 0.33        |
| <b>14</b> | <b>14</b> | <b>0</b> | <b>20.86</b> | <b>50.87</b> | <b>1.44</b> | <b>107.26</b> | <b>4.14</b> | 8        | 14       | 0        | 407.59      | 413.67       | 0.01        | 379.02       | 0.07        |
| 14        | 13        | 0        | 499.89       | 478.94       | 0.04        | 460.92        | 0.08        | 8        | 13       | 0        | 385.09      | 366.66       | 0.05        | 287.63       | 0.25        |
| 14        | 12        | 0        | 292.23       | 269.80       | 0.08        | 300.99        | 0.03        | 8        | 12       | 0        | 398.74      | 367.24       | 0.08        | 301.99       | 0.24        |
| 14        | 11        | 0        | 606.21       | 580.16       | 0.04        | 525.56        | 0.13        | 8        | 11       | 0        | 722.81      | 683.22       | 0.05        | 518.26       | 0.28        |
| 14        | 10        | 0        | 646.32       | 601.57       | 0.07        | 669.65        | 0.04        | 8        | 10       | 0        | 85.76       | 83.17        | 0.03        | 78.79        | 0.08        |
| 14        | 9         | 0        | 860.07       | 820.86       | 0.05        | 787.53        | 0.08        | <b>8</b> | <b>9</b> | <b>0</b> | <b>8.01</b> | <b>27.15</b> | <b>2.39</b> | <b>39.13</b> | <b>3.89</b> |
| 14        | 8         | 0        | 358.53       | 332.21       | 0.07        | 324.87        | 0.09        | 8        | 8        | 0        | 896.86      | 851.94       | 0.05        | 589.38       | 0.34        |
| 14        | 7         | 0        | 681.36       | 668.68       | 0.02        | 576.98        | 0.15        | 8        | 7        | 0        | 556.19      | 524.18       | 0.06        | 419.52       | 0.25        |
| 14        | 6         | 0        | 106.9        | 112.57       | 0.05        | 84.99         | 0.20        | 8        | 6        | 0        | 726.95      | 686.99       | 0.05        | 550.99       | 0.24        |
| 14        | 5         | 0        | 126.26       | 132.99       | 0.05        | 90.37         | 0.28        | 8        | 5        | 0        | 801.94      | 759.75       | 0.05        | 588.94       | 0.27        |
| 14        | 4         | 0        | 268.05       | 263.09       | 0.02        | 235.68        | 0.12        | 8        | 4        | 0        | 350.58      | 335.85       | 0.04        | 235.91       | 0.33        |
| 13        | 15        | 0        | 485.27       | 462.25       | 0.05        | 405.44        | 0.16        | 7        | 15       | 0        | 218.99      | 234.03       | 0.07        | 173.69       | 0.21        |
| 13        | 14        | 0        | 356.15       | 340.18       | 0.04        | 302.92        | 0.15        | 7        | 14       | 0        | 1709.09     | 1606.52      | 0.06        | 1708.67      | 0.00        |
| 13        | 13        | 0        | 1149.61      | 1059.99      | 0.08        | 1160.89       | 0.01        | 7        | 13       | 0        | 1367.24     | 1285.66      | 0.06        | 1358.00      | 0.01        |
| 13        | 12        | 0        | 216.53       | 214.50       | 0.01        | 174.26        | 0.20        | 7        | 12       | 0        | 662.9       | 625.29       | 0.06        | 624.81       | 0.06        |
| 13        | 11        | 0        | 1223.02      | 1133.39      | 0.07        | 1196.68       | 0.02        | 7        | 11       | 0        | 1236.52     | 1145.95      | 0.07        | 1323.64      | 0.07        |
| 13        | 10        | 0        | 426.65       | 403.27       | 0.05        | 358.40        | 0.16        | 7        | 10       | 0        | 311.26      | 289.61       | 0.07        | 333.50       | 0.07        |
| 13        | 9         | 0        | 918.49       | 836.41       | 0.09        | 1002.50       | 0.09        | 7        | 9        | 0        | 378.71      | 356.56       | 0.06        | 351.76       | 0.07        |
| 13        | 8         | 0        | 93.16        | 97.20        | 0.04        | 86.90         | 0.07        | 7        | 8        | 0        | 1498.04     | 1390.75      | 0.07        | 1427.53      | 0.05        |
| 13        | 7         | 0        | 146.65       | 111.93       | 0.24        | 370.75        | 1.53        | 7        | 7        | 0        | 245.37      | 228.05       | 0.07        | 262.17       | 0.07        |
| 13        | 6         | 0        | 893          | 824.27       | 0.08        | 855.68        | 0.04        | 7        | 6        | 0        | 671.73      | 629.14       | 0.06        | 662.50       | 0.01        |
| 13        | 5         | 0        | 257.16       | 232.58       | 0.10        | 311.06        | 0.21        | 7        | 5        | 0        | 778.76      | 724.03       | 0.07        | 756.87       | 0.03        |

|           |           |          |              |              |              |               |             |          |          |          |              |              |             |               |             |
|-----------|-----------|----------|--------------|--------------|--------------|---------------|-------------|----------|----------|----------|--------------|--------------|-------------|---------------|-------------|
| 13        | 4         | 0        | 1261.17      | 1171.24      | 0.07         | 1320.11       | 0.05        | 7        | 4        | 0        | 1146.02      | 1054.02      | 0.08        | 916.75        | 0.20        |
| 12        | 15        | 0        | 52.75        | 57.86        | 0.10         | 49.83         | 0.06        | 6        | 15       | 0        | 940.32       | 863.88       | 0.08        | 1017.66       | 0.08        |
| 12        | 14        | 0        | 848.74       | 797.85       | 0.06         | 738.27        | 0.13        | 6        | 14       | 0        | 420.59       | 401.57       | 0.05        | 337.22        | 0.20        |
| 12        | 13        | 0        | 779.71       | 728.85       | 0.07         | 678.33        | 0.13        | 6        | 13       | 0        | 76.35        | 85.81        | 0.12        | 117.27        | 0.54        |
| <b>12</b> | <b>12</b> | <b>0</b> | <b>71.84</b> | <b>99.87</b> | <b>0.39</b>  | <b>175.15</b> | <b>1.44</b> | 6        | 12       | 0        | 142.85       | 136.45       | 0.04        | 141.40        | 0.01        |
| <b>12</b> | <b>11</b> | <b>0</b> | <b>33.66</b> | <b>54.62</b> | <b>0.62</b>  | <b>110.16</b> | <b>2.27</b> | 6        | 11       | 0        | 259.31       | 246.29       | 0.05        | 292.42        | 0.13        |
| 12        | 10        | 0        | 351.8        | 326.95       | 0.07         | 330.60        | 0.06        | 6        | 10       | 0        | 226.49       | 215.36       | 0.05        | 268.17        | 0.18        |
| 12        | 9         | 0        | 179.03       | 170.95       | 0.05         | 143.44        | 0.20        | 6        | 9        | 0        | 1036.46      | 962.12       | 0.07        | 1047.75       | 0.01        |
| 12        | 8         | 0        | 661.74       | 598.35       | 0.10         | 614.85        | 0.07        | 6        | 8        | 0        | 92.91        | 84.33        | 0.09        | 95.98         | 0.03        |
| 12        | 7         | 0        | 1959.28      | 1801.15      | 0.08         | 2000.03       | 0.02        | 6        | 7        | 0        | 1658.77      | 1514.36      | 0.09        | 1541.82       | 0.07        |
| 12        | 6         | 0        | 400.67       | 372.29       | 0.07         | 347.30        | 0.13        | 6        | 6        | 0        | 1572.69      | 1466.04      | 0.07        | 1701.61       | 0.08        |
| 12        | 5         | 0        | 1451.56      | 1331.97      | 0.08         | 1401.46       | 0.03        | 6        | 5        | 0        | 2078.15      | 1949.36      | 0.06        | 2144.43       | 0.03        |
| 12        | 4         | 0        | 117.12       | 104.85       | 0.10         | 136.19        | 0.16        | 6        | 4        | 0        | 1193.89      | 1118.89      | 0.06        | 1050.45       | 0.12        |
| 11        | 15        | 0        | 1274.6       | 1177.02      | 0.08         | 1135.88       | 0.11        | 5        | 15       | 0        | 641.56       | 595.28       | 0.07        | 642.92        | 0.00        |
| 11        | 14        | 0        | 1310.49      | 1197.69      | 0.09         | 1317.61       | 0.01        | 5        | 14       | 0        | 569.29       | 528.86       | 0.07        | 682.76        | 0.20        |
| 11        | 13        | 0        | 155.39       | 141.02       | 0.09         | 147.16        | 0.05        | 5        | 13       | 0        | 641.29       | 595.14       | 0.07        | 669.67        | 0.04        |
| 11        | 12        | 0        | 87.11        | 79.89        | 0.08         | 90.34         | 0.04        | 5        | 12       | 0        | 385.65       | 358.87       | 0.07        | 415.65        | 0.08        |
| 11        | 11        | 0        | 601.96       | 551.54       | 0.08         | 587.95        | 0.02        | 5        | 11       | 0        | 227.69       | 214.54       | 0.06        | 204.94        | 0.10        |
| 11        | 10        | 0        | 267.75       | 243.51       | 0.09         | 260.08        | 0.03        | 5        | 10       | 0        | 347.6        | 326.38       | 0.06        | 328.63        | 0.05        |
| 11        | 9         | 0        | 345.26       | 309.20       | 0.10         | 362.41        | 0.05        | <b>5</b> | <b>9</b> | <b>0</b> | <b>20.71</b> | <b>57.53</b> | <b>1.78</b> | <b>114.41</b> | <b>4.52</b> |
| 11        | 8         | 0        | 1239.06      | 1137.83      | 0.08         | 1057.75       | 0.15        | 5        | 8        | 0        | 1539.322     | 1422.43      | 0.08        | 1380.10       | 0.10        |
| 11        | 7         | 0        | 963.78       | 871.50       | 0.10         | 885.66        | 0.08        | 5        | 7        | 0        | 734.355      | 675.08       | 0.08        | 897.25        | 0.22        |
| 11        | 6         | 0        | 169.48       | 172.22       | 0.02         | 179.56        | 0.06        | 5        | 6        | 0        | 1276.226     | 1172.88      | 0.08        | 1542.77       | 0.21        |
| <b>11</b> | <b>5</b>  | <b>0</b> | <b>4.7</b>   | <b>75.16</b> | <b>14.99</b> | <b>169.74</b> | <b>35.1</b> | 5        | 5        | 0        | 1304.423     | 1220.63      | 0.06        | 1285.38       | 0.01        |

|           |           |          |              |              |             |               |             |          |           |          |              |              |             |              |             |
|-----------|-----------|----------|--------------|--------------|-------------|---------------|-------------|----------|-----------|----------|--------------|--------------|-------------|--------------|-------------|
| 11        | 4         | 0        | 232.14       | 226.63       | 0.02        | 294.30        | 0.27        | 5        | 4         | 0        | 219.441      | 215.97       | 0.02        | 283.23       | 0.29        |
| 10        | 15        | 0        | 1312.66      | 1217.34      | 0.07        | 1198.69       | 0.09        | 4        | 15        | 0        | 740.335      | 693.27       | 0.06        | 718.09       | 0.03        |
| 10        | 14        | 0        | 523.55       | 476.59       | 0.09        | 555.52        | 0.06        | 4        | 14        | 0        | 696.137      | 654.89       | 0.06        | 785.23       | 0.13        |
| 10        | 13        | 0        | 937.45       | 871.30       | 0.07        | 838.97        | 0.11        | 4        | 13        | 0        | 316.475      | 298.97       | 0.06        | 332.46       | 0.05        |
| 10        | 12        | 0        | 27.12        | 26.18        | 0.03        | 44.19         | 0.63        | 4        | 12        | 0        | 248.249      | 238.62       | 0.04        | 183.95       | 0.26        |
| 10        | 11        | 0        | 266.22       | 251.80       | 0.05        | 227.62        | 0.14        | 4        | 11        | 0        | 141.391      | 137.01       | 0.03        | 90.99        | 0.36        |
| <b>10</b> | <b>10</b> | <b>0</b> | <b>44.03</b> | <b>96.23</b> | <b>1.19</b> | <b>176.72</b> | <b>3.01</b> | <b>4</b> | <b>10</b> | <b>0</b> | <b>9.473</b> | <b>12.56</b> | <b>0.33</b> | <b>27.53</b> | <b>1.91</b> |
| 10        | 9         | 0        | 815.12       | 743.33       | 0.09        | 874.84        | 0.07        | 4        | 9         | 0        | 132.585      | 128.05       | 0.03        | 107.41       | 0.19        |
| 10        | 8         | 0        | 257.22       | 260.94       | 0.01        | 257.20        | 0.00        | 4        | 8         | 0        | 611.249      | 579.59       | 0.05        | 503.28       | 0.18        |
| 10        | 7         | 0        | 641.8        | 595.20       | 0.07        | 700.55        | 0.09        | 4        | 7         | 0        | 206.147      | 190.97       | 0.07        | 320.08       | 0.55        |
| 10        | 6         | 0        | 248.37       | 233.29       | 0.06        | 265.64        | 0.07        | 4        | 6         | 0        | 437.267      | 410.74       | 0.06        | 591.85       | 0.35        |
| 10        | 5         | 0        | 119.71       | 111.89       | 0.07        | 215.90        | 0.80        | 4        | 5         | 0        | 346.362      | 328.70       | 0.05        | 346.36       | 0.00        |
| 10        | 4         | 0        | 617.62       | 576.90       | 0.07        | 650.90        | 0.05        | 4        | 4         | 0        | 1473.183     | 1384.90      | 0.06        | 1313.24      | 0.11        |
